# Supplementary material for: Chlorine-functionalized keto-enamine-based covalent organic frameworks for CO2 separation and capture
Source: Royal Society of Chemistry journal article supplement (doi:10.1039/c8ce01397g), 2018-01-01
Supplement: c8ce01397g1.pdf [file c8ce01397g1.pdf]

## Supplementary Materials

# Chlorine Functionalized Keto-Enamine Based Covalent Organic Frameworks for CO<sub>2</sub> Separation and Capture

*Digambar B. Shinde<sup>1,§</sup>, Mayur Ostwal<sup>1,§</sup>, Xinbo Wang<sup>1</sup>, Amol M. Hengne<sup>2</sup>, Yang Liu<sup>1</sup>, Guan Sheng<sup>1</sup>, Kuo-Wei Huang<sup>2</sup>, and Zhiping Lai\**

<sup>1</sup>Advanced Membranes and Porous Materials Center, Division of Physical Science and Engineering, King Abdullah University of Science and Technology (KAUST), Thuwal, Saudi Arabia

<sup>2</sup>Catalysis Center, Division of Physical Science and Engineering, King Abdullah University of Science and Technology (KAUST), Thuwal, Saudi Arabia

§These authors contributed equally for this work

\* Corresponding author E-mail: [Zhiping.lai@kaust.edu.sa](mailto:Zhiping.lai@kaust.edu.sa)

## 1. Materials and Characterization tools:

### 1.1 Materials:

Anhydrous 1,4-dioxane, mesitylene (98%), phloroglucinol, hexamethylenetetramine, trifluoroacetic acid, anhydrous sodium sulfate, 2,5-dichloro-1,4-phenylene diamine, 3,3'-dichlorobenzidine, glacial acetic acid and acetone were all purchased from Sigma-Aldrich and used without further purification.

### 1.2 Characterization tools:

**Fourier transform infrared (FT-IR):** The FTIR measurements was carried out on Nicolet iS10 FTIR spectrometer ranging from 4000 to 525 cm<sup>-1</sup>.

**Powder X-ray diffraction (PXRD):** PXRD measurement were carried out on Bruker D8-advance diffractometer in reflectance Bragg-Brentano geometry employing Ni filtered Cu K $\alpha$  line focused radiation at 1600 W (40 kV, 40 mA) power and equipped with a Na(Tl) scintillation detector fitted at 0.3 mm radiation entrance slit.

**Scanning electron microscopy (SEM):** The SEM images were taken on Magellan XHR SEM.

**High-resolution transmission electron microscopy (HR-TEM):** The HR-TEM images were taken on Titan CT (FEI) transmission electron microscope operated at 300 kV.

**Sorption:** The N<sub>2</sub>, CO<sub>2</sub>, CH<sub>4</sub> sorption were measured up to 1 bar using a Micromeritics ASAP 2020, 2050 surface area and pore size analyzer. Before the measurements, the sample (~50 mg) was degassed under reduced pressure.

**Thermogravimetric analyses (TGA):** the experiment were carried out on a TG50 analyzer (Mettler- Toledo) or a SDT Q600 TG-DTA analyzer under N<sub>2</sub> atmosphere at a heating rate of 5 °C min<sup>-1</sup> within a temperature range of 30-900 °C.

**Solid and liquid NMR:** <sup>13</sup>C and <sup>1</sup>H NMR measurement were carried out on Bruker 400 and 500 MHz instrument respectively.

## 1.2. Synthesis of 1,3,5-triformylphloroglucinol (TFP)<sup>1</sup>

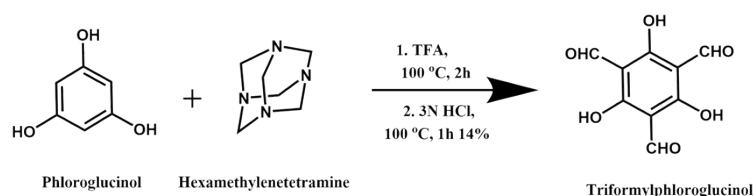

Scheme S1: synthesis procedure of TFP

The phloroglucinol (9.0 g, 71.4 mmol) and hexamethylenetetramine (HMTA) (23.6 g, 157.6 mmol) were first mixed together under argon atmosphere. Then, trifluoroacetic acid (140 mL) was added at 0°C and stirred for 10 min. After that, the solution was heated to 100 °C and kept for 2 h under argon atmosphere. After 2h, approximately 450 mL of 3 M HCl was added slowly in the reaction mixture. The reaction continued stirred for another 1 h. Then, after cooling to room temperature the reaction mixture was filtered through a celite bed. The obtained filtrate was extracted by dichloromethane (3 x 200 mL). The organic layer was separated and dried over anhydrous sodium sulfate and then concentrated under reduced pressure. The obtained residue was washed with copious amount of hot ethanol to obtain pure TFP (2.2 g, 14% yield) as a white powder.

<sup>1</sup>H NMR (400 MHz, CDCl<sub>3</sub>) of TFP:  $\delta$  14.08 (s, 3H), 10.15 (s, 3H).

### 1.3 Synthesis of CAA-COF-1 and CAA-COF-2 by the solvothermal method:

The synthesis of COFs (**CAA-COF-1** and **CAA-COF-2**) in pyrex glass tube (o.d.  $\times$  i.d. = 22  $\times$  12 mm<sup>2</sup> and length 18 cm) the starting material is 1,3,5-triformylphloroglucinol (TFA) (63.0 mg, 0.30 mmol) and 2,5-Dichloro-1,4-phenylene diamine (2,5-DCA) (79.6 mg, 0.45 mmol) or 3,3'-Dichlorobenzidine (3,3'-DCB) (146.6 mg, 0.45 mmol) and 4.5 mL of mesitylene and 1.0 mL of 1,4-dioxane, 0.4 mL of 6.0 M aqueous acetic acid. The resulting mixture was sonicated for 10-15 minutes for homogenous dispersion. The glass tube was then flash frozen at 77 K in liquid N<sub>2</sub> bath and then degassed by the freeze-pump-thaw cycle for 2 to 3 times to ensure the removal of dissolved gases. The tube was sealed off and then heated at 120 °C for 72h. A dark red colored precipitate formed was filtered through the whatmann filtre paper and washed with 5-6 times with mesitylene, water and then acetone. The powder collected was then solvent exchanged with acetone three times and then dried at 150 °C under vacuum for 24 hours to give a dark red colored powder in 86 % isolated yield. The elemental micro analysis (C, N, H and Cl) of the COFs and the experimental data are very well matched to the theoretical. This is indicating the purity of the material.

#### CAA-COF-1:

**IR (powder):**  $\nu_{\text{max}}$  1575, 1442, 1246, 1068, 1046, 1022 and 845 cm<sup>-1</sup>;

**<sup>13</sup>CSSNMR:** 107.7, 116.2, 124.2, 132.5, 146.3 and 184.1;

**Elemental Analysis data:** Anal. Calcd. For C<sub>6</sub>ClONH<sub>3</sub>: C, 51.28; H, 2.15; N, 9.97; Cl, 25.22  
found: C, 52.47; H, 2.89; N, 10.09; Cl, 25.76.

#### CAA-COF-2:

**IR (powder):**  $\nu_{\text{max}}$  1582, 1441, 1262, 1047, 1025, 1011 and 826 cm<sup>-1</sup>;

**<sup>13</sup>CSSNMR:** 108.1, 115.3, 124.1, 132.7, 146.1 and 184.3;

**Elemental Analysis data:** Anal. Calcd. For C<sub>9</sub>ClONH<sub>5</sub>: C, 60.87; H, 2.27; N, 7.89; Cl, 19.96  
found: C, 61.29; H, 3.01; N, 8.14; Cl, 20.57.

## 2. COFs characterization:

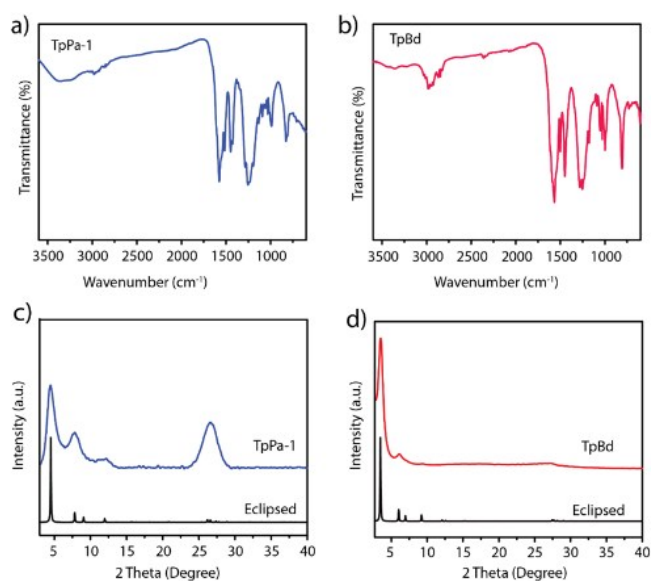

**Figure S1:** (a) FT-IR spectra of TpPa-1; (b) FT-IR spectra of TpBd; (c) PXRD data of TpPa-1 and compared with eclipsed structure; (d) PXRD data of TpBd and compared with eclipsed structure

**Table S1.** Fractional atomic coordinates for the unit cell of CAA-COF-1

| CAA-COF-1                                                                                                                                              |         |         |     |
|--------------------------------------------------------------------------------------------------------------------------------------------------------|---------|---------|-----|
| <i>P6/m space group, <math>a = b = 22.55</math>, <math>c = 3.4 \text{ \AA}</math>; <math>\alpha = \beta = 90.0</math>, <math>\gamma = 120.0</math></i> |         |         |     |
| O1                                                                                                                                                     | 0.28355 | 0.52709 | 0.5 |
| N1                                                                                                                                                     | 0.41129 | 0.55212 | 0.5 |
| C1                                                                                                                                                     | 0.30695 | 0.59146 | 0.5 |
| C2                                                                                                                                                     | 0.38113 | 0.64063 | 0.5 |
| C3                                                                                                                                                     | 0.42797 | 0.61784 | 0.5 |
| C4                                                                                                                                                     | 0.45481 | 0.52704 | 0.5 |
| C5                                                                                                                                                     | 0.42936 | 0.4559  | 0.5 |
| C6                                                                                                                                                     | 0.52674 | 0.57065 | 0.5 |
| Cl1                                                                                                                                                    | 0.34128 | 0.40231 | 0.5 |

**Table S2.** Fractional atomic coordinates for the unit cell of CAA-COF-2

| <b>CAA-COF-2</b>                                                                                                                              |         |         |   |
|-----------------------------------------------------------------------------------------------------------------------------------------------|---------|---------|---|
| <i>P6/m space group, <math>a = b = 30.48</math>, <math>c = 3.39</math> Å, <math>\alpha = \beta = 90.0</math>, <math>\gamma = 120.0</math></i> |         |         |   |
| O1                                                                                                                                            | 0.2956  | 0.5612  | 0 |
| N2                                                                                                                                            | 0.3872  | 0.5781  | 0 |
| C1                                                                                                                                            | 0.3135  | 0.6107  | 0 |
| C2                                                                                                                                            | 0.4039  | 0.6298  | 0 |
| C3                                                                                                                                            | 0.4195  | 0.5569  | 0 |
| C4                                                                                                                                            | 0.4739  | 0.5883  | 0 |
| C5                                                                                                                                            | 0.5046  | 0.5656  | 0 |
| C6                                                                                                                                            | 0.4829  | 0.5112  | 0 |
| C7                                                                                                                                            | 0.4281  | 0.4803  | 0 |
| C8                                                                                                                                            | 0.3968  | 0.5027  | 0 |
| C9                                                                                                                                            | 0.3684  | 0.6472  | 0 |
| Cl1                                                                                                                                           | 0.33219 | 0.46441 | 0 |

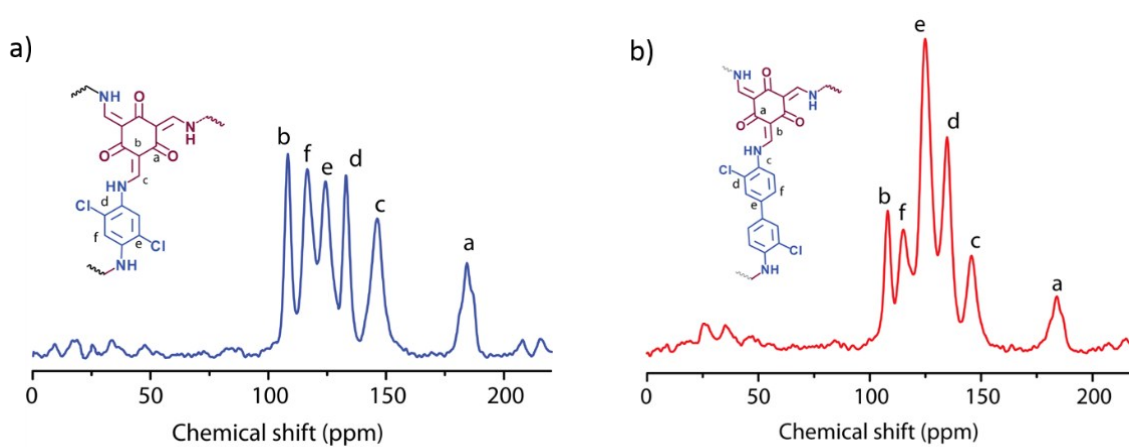

**Figure S2:** (a)  $^{13}\text{C}$  CP-MAS spectrum of CAA-COF-1 and (b) CAA-COF-2.

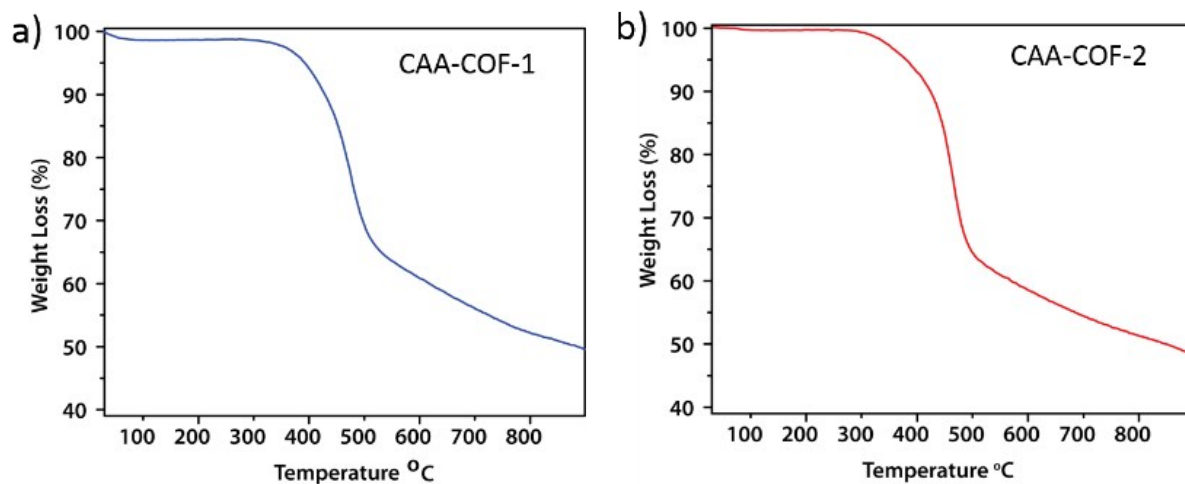

**Figure S3:** (a) TGA data of CAA-COF-1 and (b) CAA-COF-2 under N<sub>2</sub> atmosphere.

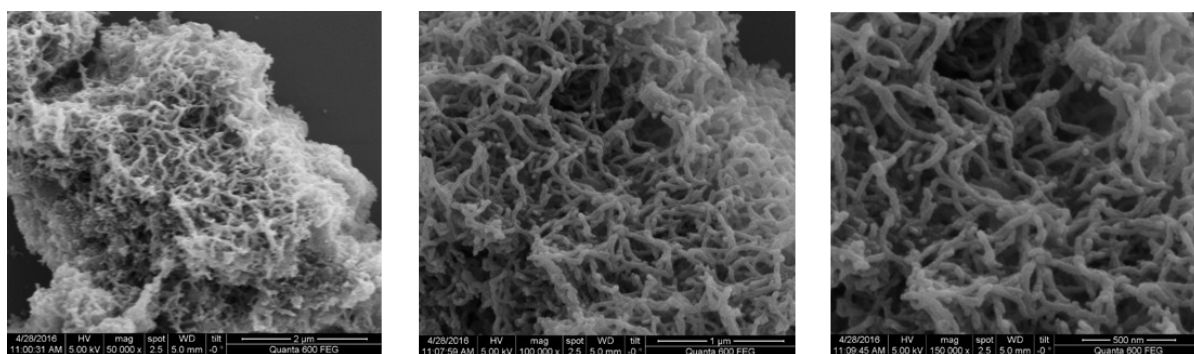

**Figure S4:** SEM images of CAA-COF-1.

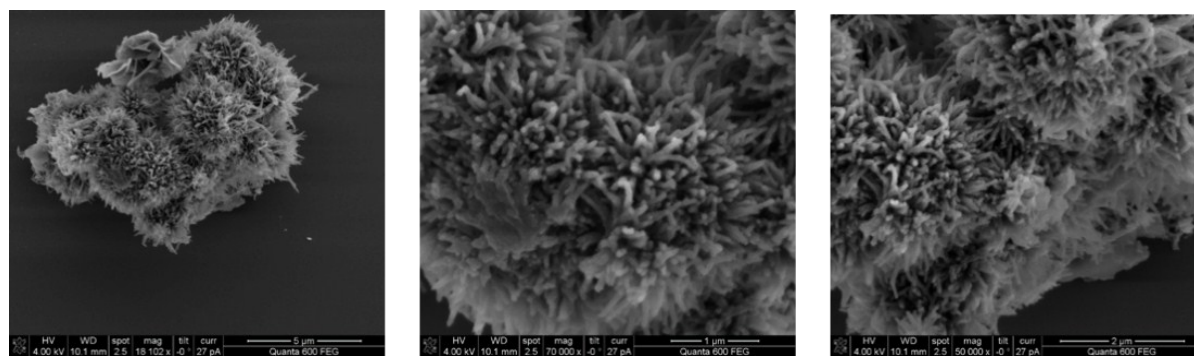

**Figure S5:** SEM images of CAA-COF-2.

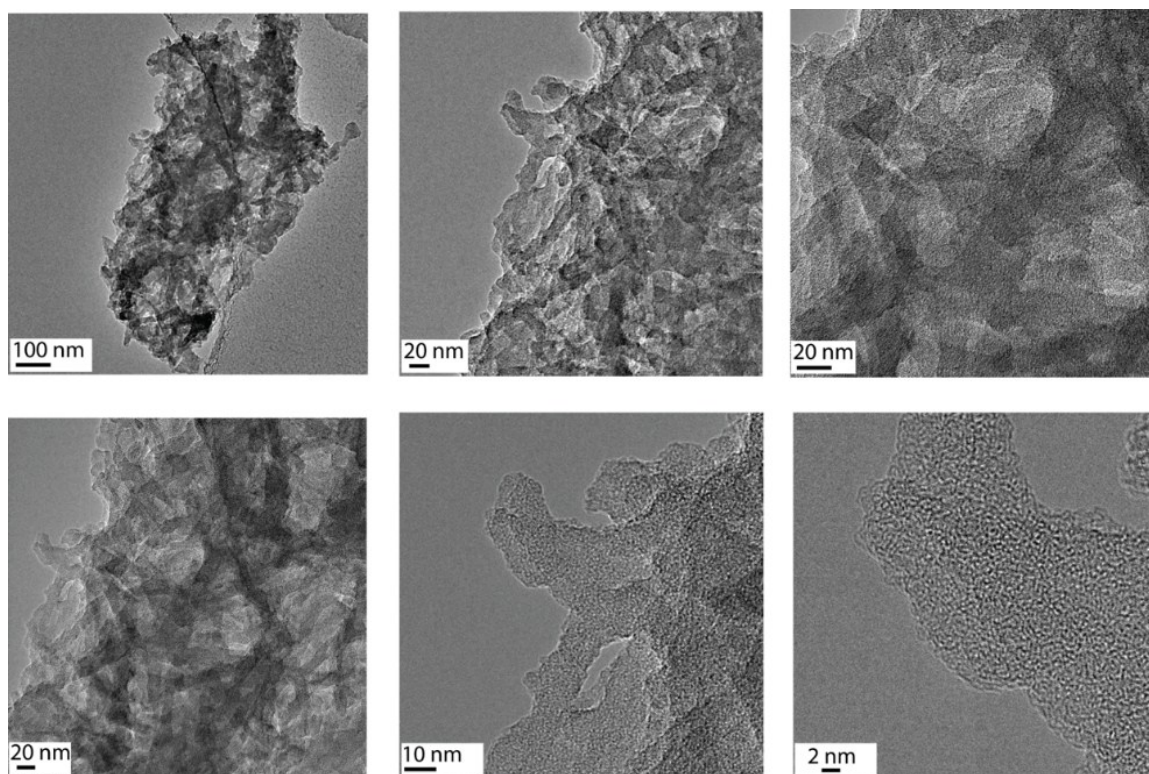

**Figure S6:** TEM images of CAA-COF-1.

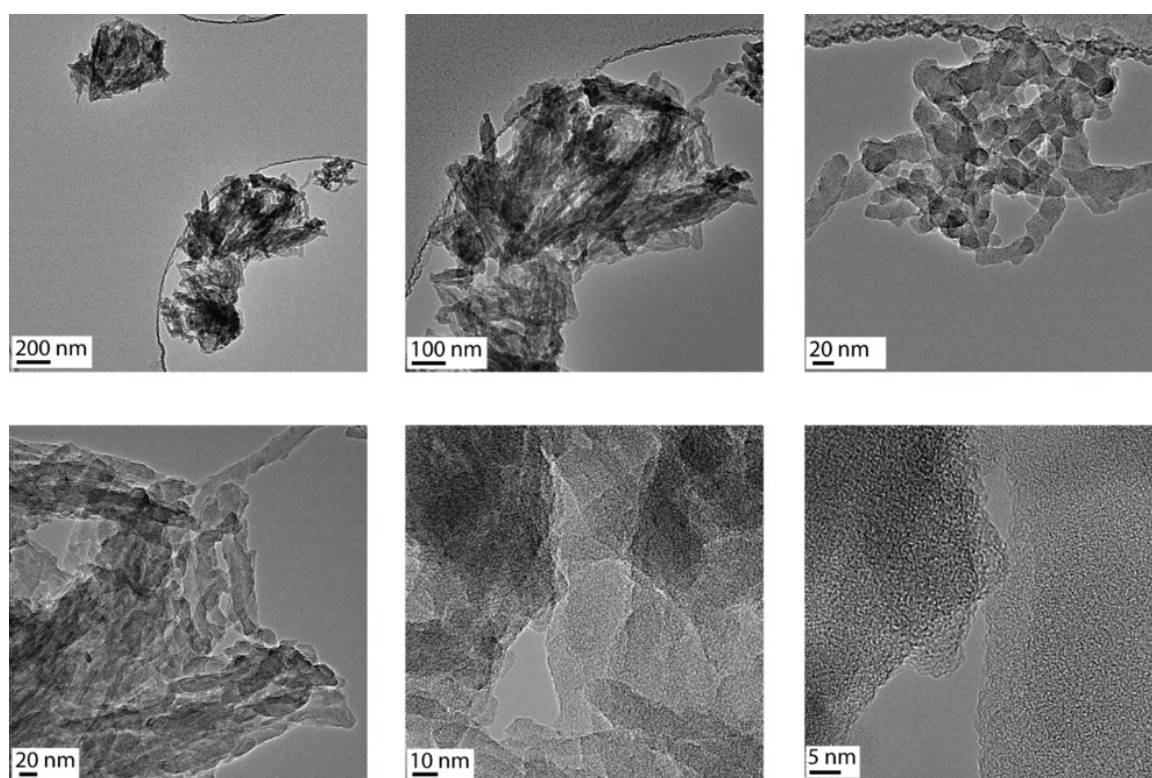

**Figure S7:** TEM images of CAA-COF-2.

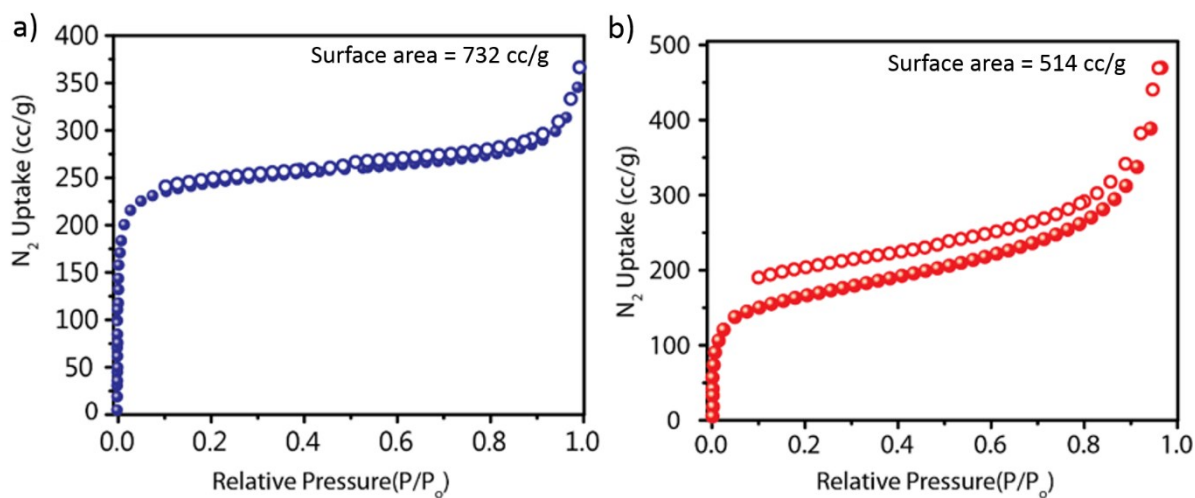

**Figure S8:** (a)  $N_2$  adsorption isotherm of TpPa-1 and (b)  $N_2$  adsorption isotherm of TpBd at 77K.

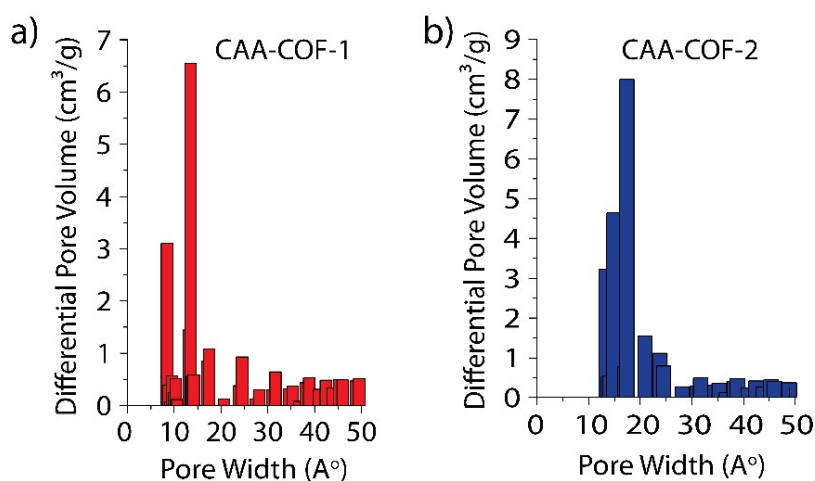

**Figure S9:** (a) Pore size distribution of CAA-COF-1 and (b) CAA-COF2 by NLDFT method from  $N_2$  adsorption data

*(After treatment with acid or base, the relative intensity decreases (without change in peak position, thus very limited loss of crystallinity (d-spacing) and we believe this may be due to loss of long range order in materials after the harsh chemical treatment.)*

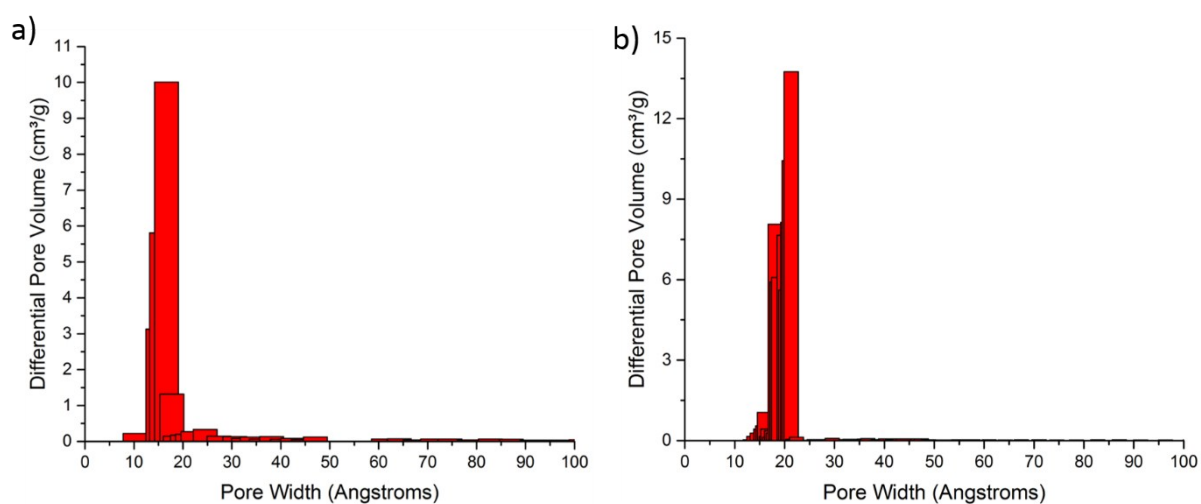

**Figure S10:** (a) Pore size distribution of TpPa-1 and (b) TpBd by NLDFT method from N<sub>2</sub> adsorption data

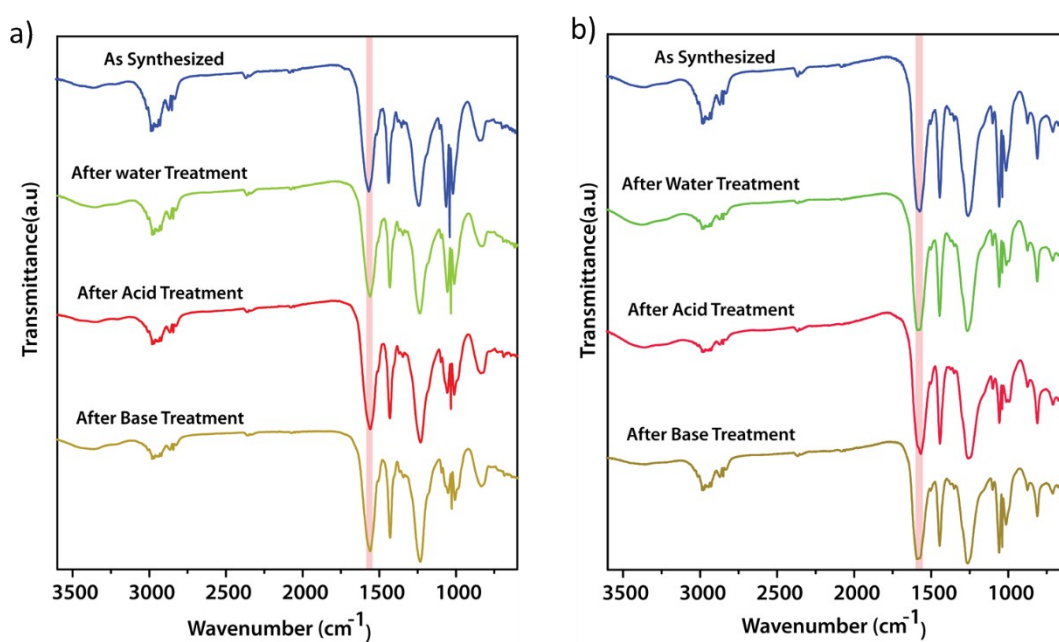

**Figure S11:** (a) FT-IR spectra of CAA-COF-1 after treatment with water, acid and base after 5 days, and (b) FT-IR spectra of CAA-COF-2 after treatment with water, acid and base after 5 days.

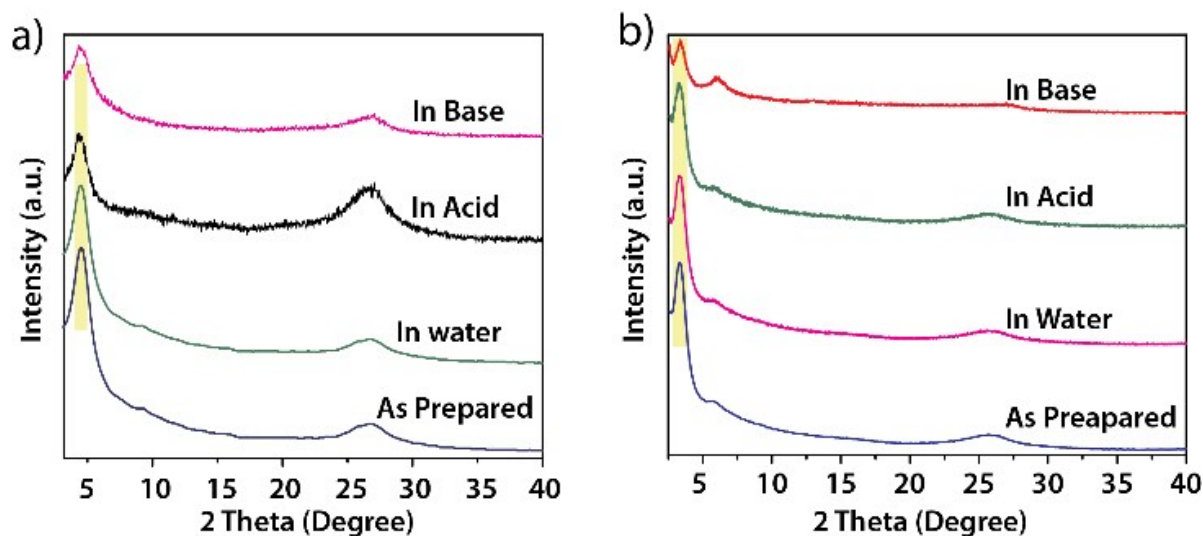

**Figure S12:** PXRD of CAA-COF-1 and (b) PXRD of CAA-COF-2 after treatment with water, acid and base after 5 days.

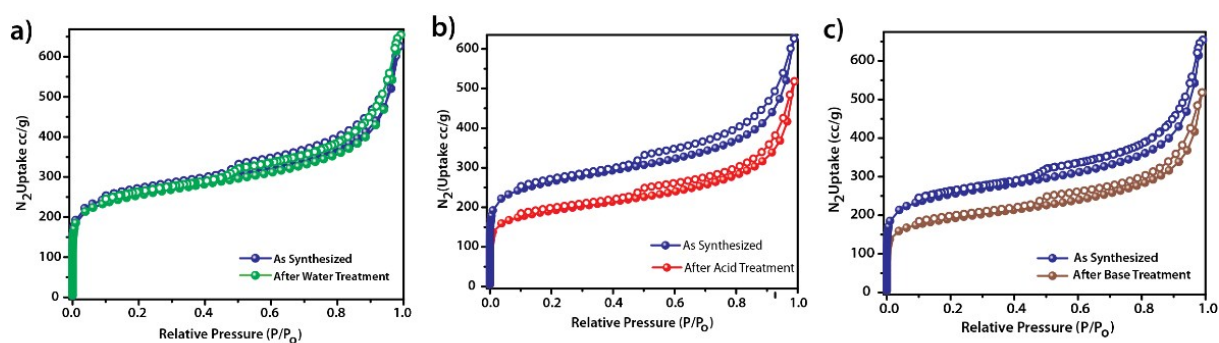

**Figure S13:** (a,b and c)  $N_2$  Uptake of CAA-COF-1 after treatment with water, acid and base for 5 days.

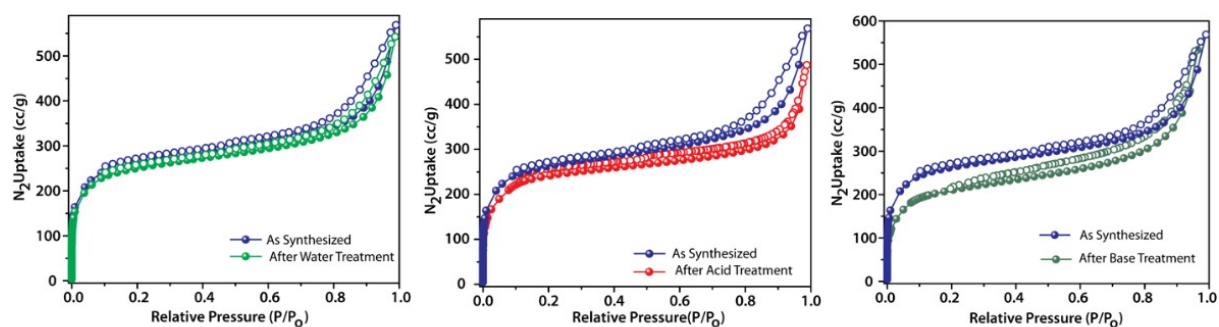

**Figure S14:** (a,b and c)  $N_2$  Uptake of CAA-COF-2 after treatment with water, acid and base for 5 days.

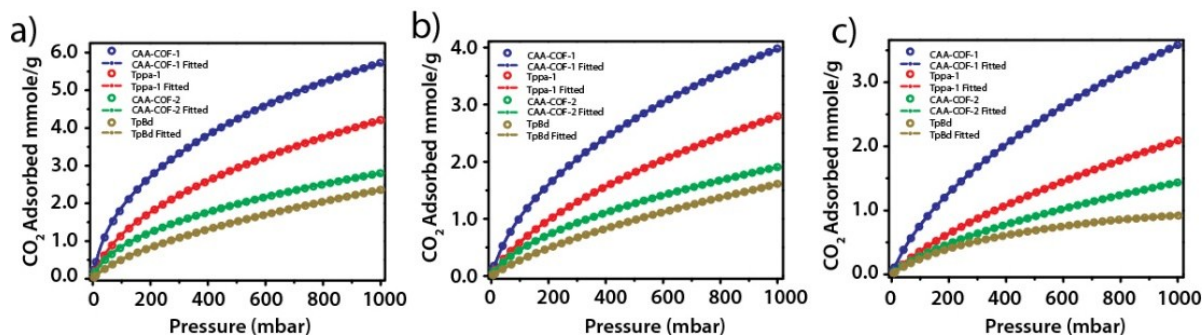

**Figure S15:** (a) CO<sub>2</sub> adsorption isotherms at 273K; (b) 298K and (c) 323K and fitted data for CAA-COF-1, TpPa-1, CAA-COF-2 and TpBd.

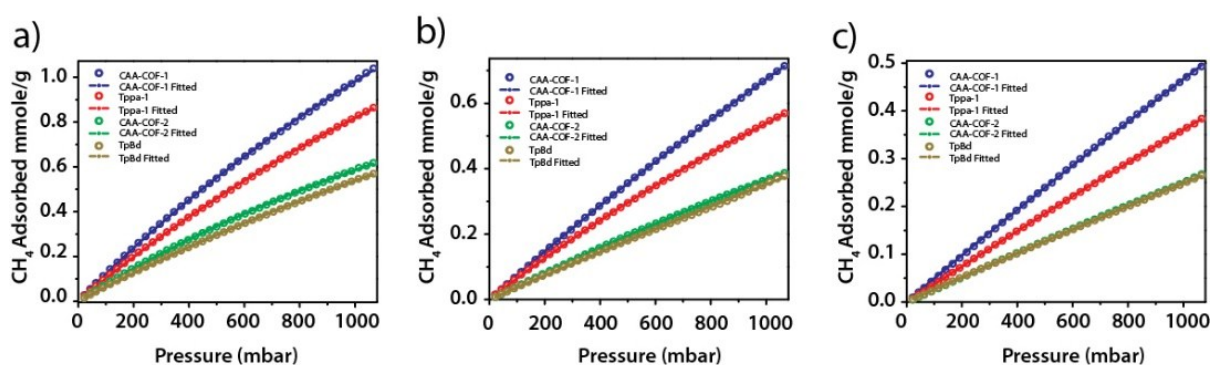

**Figure S16:** (a) CH<sub>4</sub> adsorption isotherms at 273K; (b) 293K and (c) 313K and fitted data for CAA-COF-1, TpPa-1, CAA-COF-2 and TpBd.

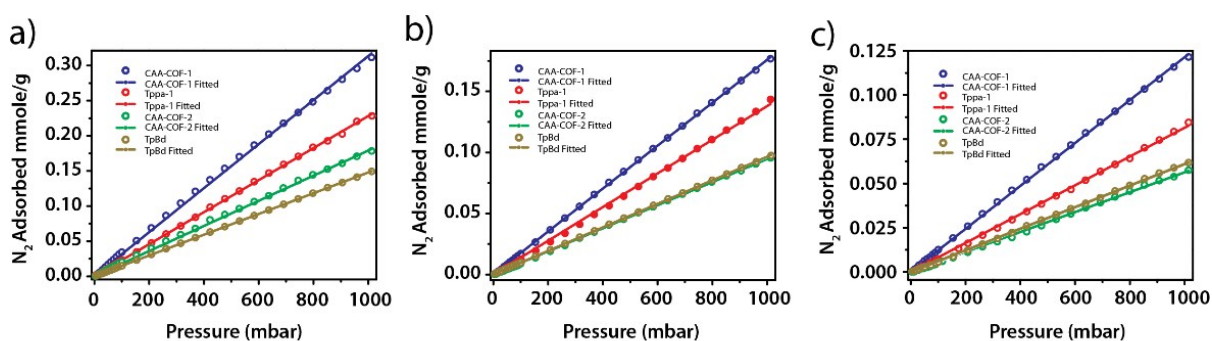

**Figure S17:** (a) N<sub>2</sub> adsorption isotherms at 273K; (b) 293K and (c) 313K and fitted data for CAA-COF-1, TpPa-1, CAA-COF-2 and TpBd.

## 2. Theory of Heat of adsorption and IAST calculation

### 2.1 Calculation of isosteric heat of adsorption (Q<sub>st</sub>):

The isosteric heat of adsorption gives the prime information about the heterogeneity of the material surface as well as the interactions between gas molecules and adsorbent.

By using virial equation, calculated the isosteric heats of adsorption for (CO<sub>2</sub> and CH<sub>4</sub>) adsorption isotherms measured at 273 , 298 and 323 K using the following virial equation,<sup>2</sup>

$$\ln p = \ln q + \frac{1}{T} \sum_{i=0}^m a_i q^i + \sum_{j=0}^n b_j q^j \quad \dots\dots\dots (2)$$

Where;

$p$ : Pressure (mbar),

$q$ : Gas uptake (mmol/g),

$T$ : Temperature (K),

$R$ : Universal gas constant,

$a_i$  and  $b_i$ : Virial coefficients,

$m$  and  $n$ : number of coefficient (m and n = 3 to 4 depending on a particular dataset).

## 2.2 Selectivity calculation based on the ideal adsorption solution theory (IAST):

The isosteric heat of adsorption then can be calculated from the following expression:

$$q_{ST} = -R \sum_{i=0}^m a_i q^i \quad \dots\dots\dots (3)$$

CO<sub>2</sub>/N<sub>2</sub> and CO<sub>2</sub>/CH<sub>4</sub> mixed gas selectivity were calculated from pure gas adsorption isotherms using the IAST (ideal adsorbed solution theory).<sup>3</sup> For the case of CO<sub>2</sub>/N<sub>2</sub>, The single-component isotherms of CO<sub>2</sub> and N<sub>2</sub> were first fitted with dual site Langmuir isotherms (Equation 4).

$$q_i = \frac{q_{1,sat} k_1 p_i}{1 + k_1 p_i} + \frac{q_{2,sat} k_2 p_i}{1 + k_2 p_i} \quad \dots\dots\dots (4)$$

Where;

$q_i$ : Gas uptake (mmol/g),

$p_i$  : Pressure (kPa),

$q_{1,sat}$  and  $q_{2,sat}$  : saturation adsorption capacity (mmol/g),

$k_1$  and  $k_2$  : Langmuir equilibrium constants (mbar)

The IAST theory is then applied to calculate the gas pair selectivity for a range of compositions at 101.325 kPa using the direct search minimization method.<sup>2</sup>

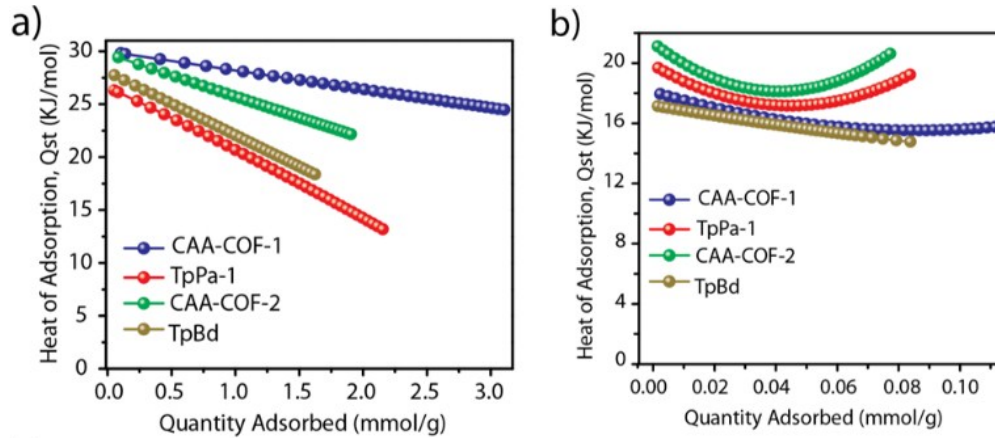

**Figure S18:** (a) Heat of adsorption ( $CO_2$ ) for CAA-COF-1, TpPa-1, CAA-COF-2 and TpBd; (b) Heat of adsorption ( $CH_4$ ) for CAA-COF-1, TpPa-1, CAA-COF-2 and TpBd .

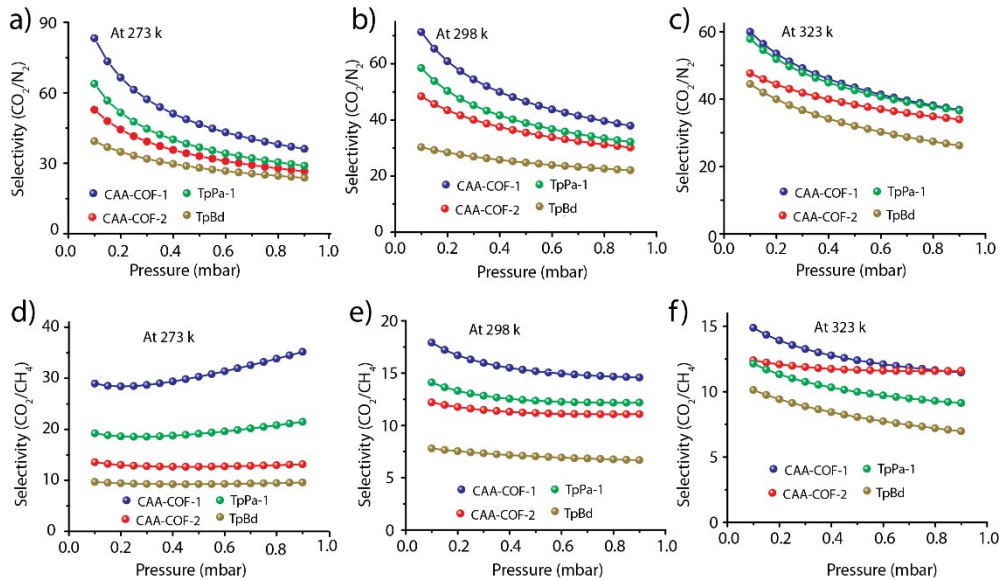

**Figure S19:** (a, b and c)  $CO_2/N_2$  IAST selectivity as a function of  $CO_2$  mole fraction at 273, 298 and 323 K for 10/90  $CO_2/N_2$  feed mixture for CAA-COF-1, TpPa-1, CAA-COF-2 and TpBd; (d, e and f)  $CO_2/CH_4$  IAST selectivity as a function of  $CO_2$  mole fraction at 273, 298 and 323 K for CAA-COF-1, TpPa-1, CAA-COF-2 and TpBd.

**Table S3.** Comparison of CAA-COF-1 and CAA-COF-2 with other COFs and other porous material.

| Porous Material                                          | Surface area (cc/g) | CO <sub>2</sub> uptake (mmol/g) | CH <sub>4</sub> uptake (mmol/g) | IAST Selectivity at 298 K       |                                  | Qst (kJ mol <sup>-1</sup> ) |                 | References                                     |
|----------------------------------------------------------|---------------------|---------------------------------|---------------------------------|---------------------------------|----------------------------------|-----------------------------|-----------------|------------------------------------------------|
|                                                          |                     |                                 |                                 | CO <sub>2</sub> /N <sub>2</sub> | CO <sub>2</sub> /CH <sub>4</sub> | CO <sub>2</sub>             | CH <sub>4</sub> |                                                |
| CU-BTC                                                   | 1663                | 1.62                            | 0.53                            | -                               | 9                                | 27.2                        | 22.2            | Nat. Commun. 3, (2012) 954                     |
| PECONF-1                                                 | 583                 | 1.34                            | 0.53                            | 51                              | 3                                | 29                          | 22.2            | Nat. Commun. 2, (2011) 401                     |
| PECONF-3                                                 | 969                 | 2.47                            | 0.58                            | 41                              | 8                                | 26                          | 24.9            | Nat. Commun. 2, (2011) 401                     |
| azo-COP-2                                                | 729                 | 1.53                            | -                               | 131                             | -                                | 24.8                        | -               | Nat. Commun. 4 (2013) 1357                     |
| Azo-POF-1                                                | 712                 | 1.88                            | -                               | 37                              | -                                | 27.5                        | -               | J. Mater. Chem. A, 2014, 2, 13831              |
| BILP-2                                                   | 1135                | 2.36                            | 0.56                            | 71                              | 7                                | 28.6                        | 18.4            | Chem. Mater. 24 (2012) 1511                    |
| [HC=C] <sub>50</sub> -H <sub>2</sub> P-COF               | 962                 | 1.17                            | -                               | 3                               | -                                | 16.5                        | -               | Angew. Chem. 2015, 127, 3029–3033              |
| [EtNH <sub>2</sub> ] <sub>50</sub> -H <sub>2</sub> P-COF | 821                 | 1.16                            | -                               | 16                              | -                                | 20.9                        | -               | Angew. Chem. 2015, 127, 3029–3033              |
| CTF-1                                                    | 746                 | 1.41                            | -                               | 20                              |                                  | 27.5                        | -               | Energy Environ. Sci. 6 (2013) 3684-3692.       |
| FCTF-1                                                   | 662                 | 3.21                            | -                               | 31                              |                                  | 35                          | -               | Energy Environ. Sci. 6 (2013) 3684-3692.       |
| CTPP                                                     | 779                 | 2.01                            | -                               | 84                              | -                                | 34                          | -               | Chem. Eng. Sci.145 (2016) 21                   |
| TMCOAP                                                   | 1104                | 2.50                            |                                 | 100                             | 15                               | 42.2                        | 32.7            | Microporous Mesoporous Mater. 255 (2018) 76e83 |
| CAA-COF-1                                                | 841                 | 4.05                            | 0.63                            | 67.2                            | 18.1                             | 29.8                        | 20.5            | This work                                      |
| CAA-COF-2                                                | 723                 | 1.63                            | 0.37                            | 51.4                            | 12.6                             | 29.7                        | 19.8            | This work                                      |
| Tppa-1                                                   | 732                 | 2.78                            | 0.54                            | 59.8                            | 14.9                             | 27.6                        | 17.1            | This work                                      |
| TpBd                                                     | 514                 | 1.22                            | 0.34                            | 31.9                            | 7.6                              | 26.9                        | 16.6            | This work                                      |

### 3. Column Breakthrough

The column breakthrough experiments were carried out at 298 K.<sup>3</sup> In this experiment, 0.5 g of CAA-COF-1 or CAA-COF-2 materials were ground well, try to make fine powder. The obtained fine powder gently packed into a column (I.D. 5.8 mm, length 150 mm), and silica wool was used for seal the ends. The packed COF materials were activated in the column with a continuous flow helium gas (5 mL/min) at 393 K for 10-12 h. After activation process, decreased the temperature to 298 K and stabilized it. After that, the feed gas was switched from helium to a gas mixture of CO<sub>2</sub>:N<sub>2</sub> or CO<sub>2</sub>:CH<sub>4</sub> (10: 90, v/v) at 5 mL/min. The effluent gas was monitored by a mass spectrometer (Pfeiffer Vacuum, Germany). The absolute adsorption capacity of gas *i* ( $q_i$ ) is calculated from the breakthrough curve using the following equation:

$$q_i = \frac{F_i \times t_0 - V_{dead} - \int_0^{t_0} F_e dt}{m} \quad (1)$$

Where:  $F_i$  is the influent flow rate of gas *i* (mL/min),

$t_0$  is the total adsorption time (min),

$V_{dead}$  is the dead volume of the system (mL),

$F_e$  is the effluent flow rate of gas *i* (mL/min) that is calculated from the MS signal;

and  $m$  is the mass of the sample (g).

The selectivity of the breakthrough experiment is defined as:

$$\alpha = (q_1/y_1)(q_2/y_2) \quad (2)$$

Where:  $y_i$  is the molar fraction of gas *i* in the gas mixture;

The CO<sub>2</sub>:N<sub>2</sub> or CO<sub>2</sub>:CH<sub>4</sub> (v:v) feed compositions, 10:90 which are associated to the two boundary composition of flue gas were investigated.

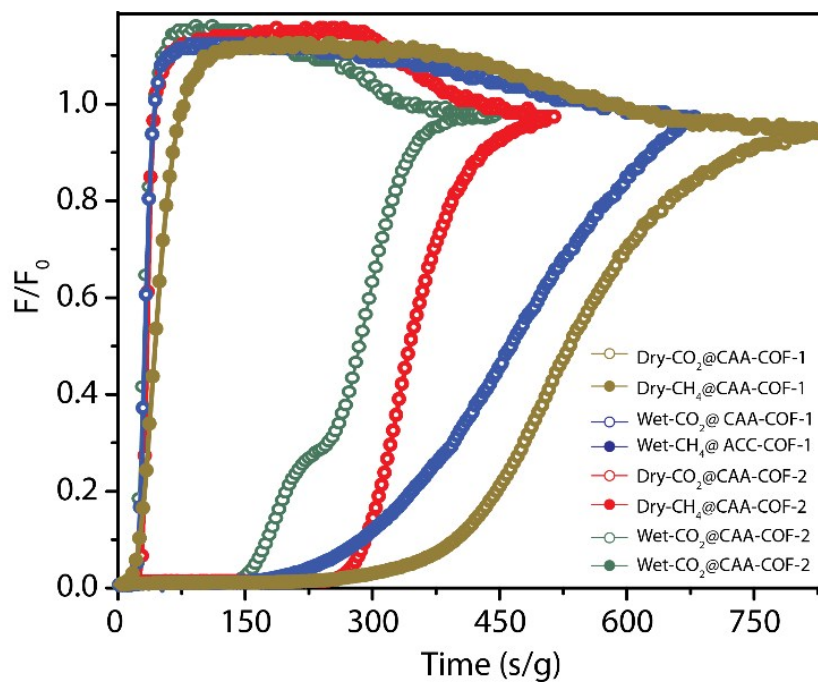

**Figure S20:** Column breakthrough experimental results for CAA-COF-1 and CAA-COF-2 using mixture ( $\text{CO}_2$  and  $\text{CH}_4$  10:90) at dry and humid condition at 298 K.

#### 4. References

1. J. H. Chong, M. Sauer, B. O. Patrick, M. J. MacLachlan, *Org. Lett.* **2003**, 5, 3823.
2. (a) S. K. Das, X.B. Wang, M. M. Ostwal, Y.F. Zhao, Y. Han and Z.P. Lai; *Chem. Eng. Sci.*, **2016**, 145, 21, (b) L. Czepirski, J. JagieŁŁo, *Chem. Eng. Sci.* 1989, 44, 797.
3. Y. Zhao, X. Liu, K. X. Yao, L. Zhao, Y. Han, *Chem. Mater.* 2012, 24, 4725.
